# Supplementary material for: The genetic architecture of the human skeletal form
Source: PubMed Central journal article supplement — bioRxiv. 2023 Jan 3:2023.01.03.521284. Preprint. [Version 1] doi: 10.1101/2023.01.03.521284 (PMC9881884; doi:10.1101/2023.01.03.521284), 2023-01-03
Supplement: NIHPP2023.01.03.521284V1-supplement-1.pdf [file NIHPP2023.01.03.521284V1-supplement-1.pdf]

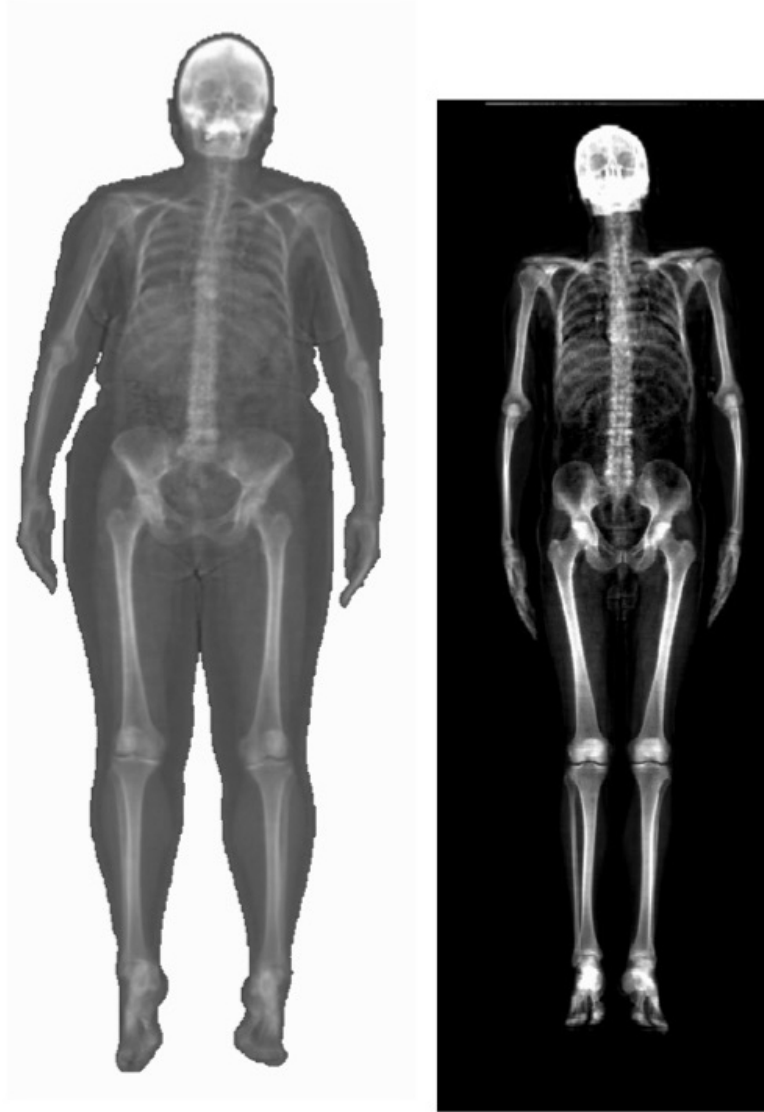

677  
678 **Fig. S1. Types of DXA images acquired from the UKB.** (Left) Image of patient imaged on  
679 white background. (Right) Image of patient imaged on black background. Sizes of images are  
680 true to scale.

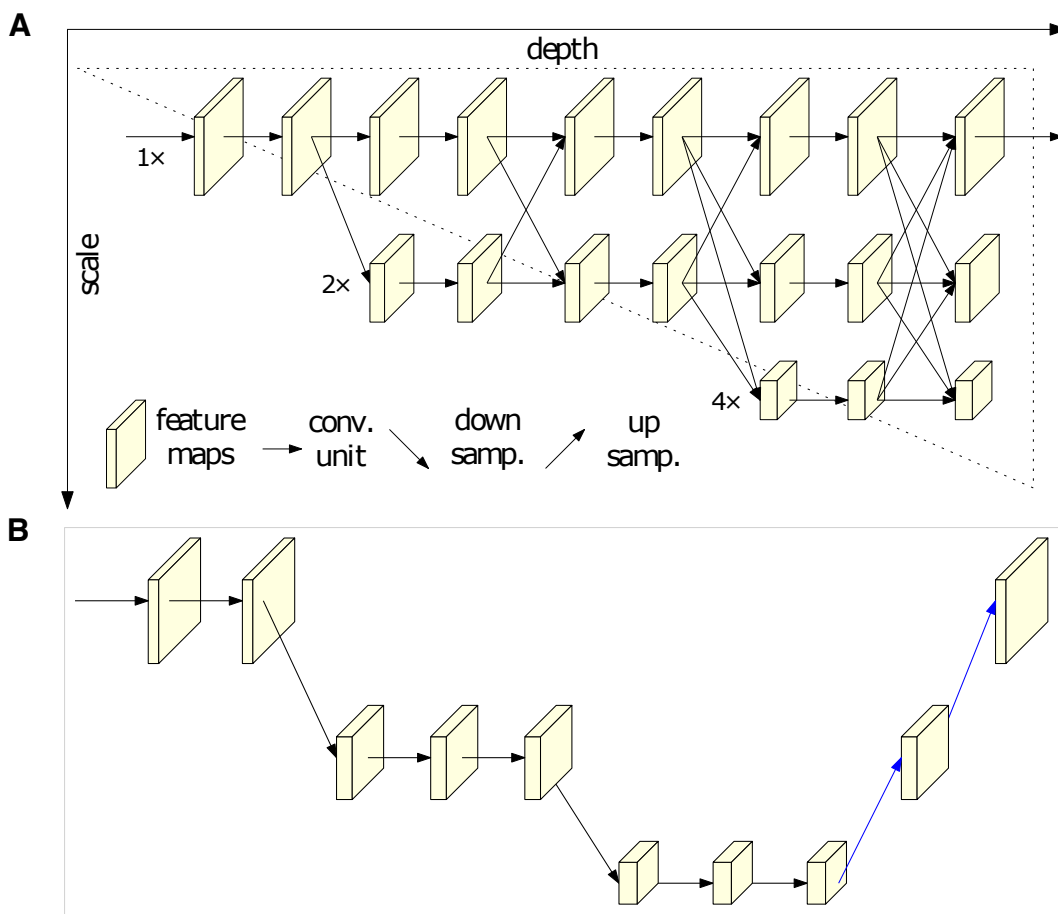

741  
742 **Fig. S2. A comparison of HRNet and ResNet deep learning architectures.** (A) High-  
743 Resolution Network (HRNet) architecture maintains parallel high to low resolution subnetworks.  
744 (B) Simple Baseline deep learning architecture (ResNet) which relies on a high-to-low and low-  
745 to-high framework. Both images are taken directly from Sun et al., (35) to illustrate the  
746 architectural differences between HRNet and a standard architecture for this prediction task.  
747

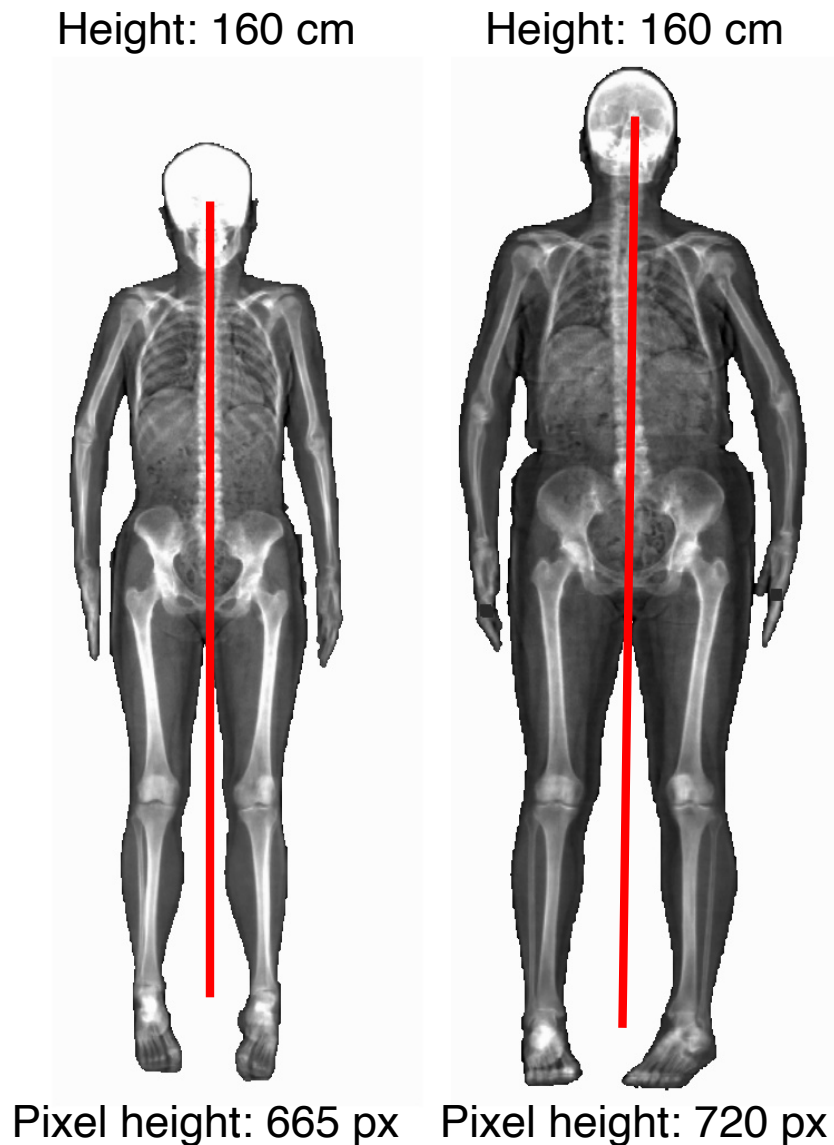

771  
772 **Fig. S3. DXA images from the UKB that have undergone different image scaling.** Example  
773 of two individuals who were measured to be the same height in the FID 50 in the UKB (overall  
774 height) but pixel-based measurements of one image were considerably smaller than the other due  
775 to image scaling/resolution differences.  
776

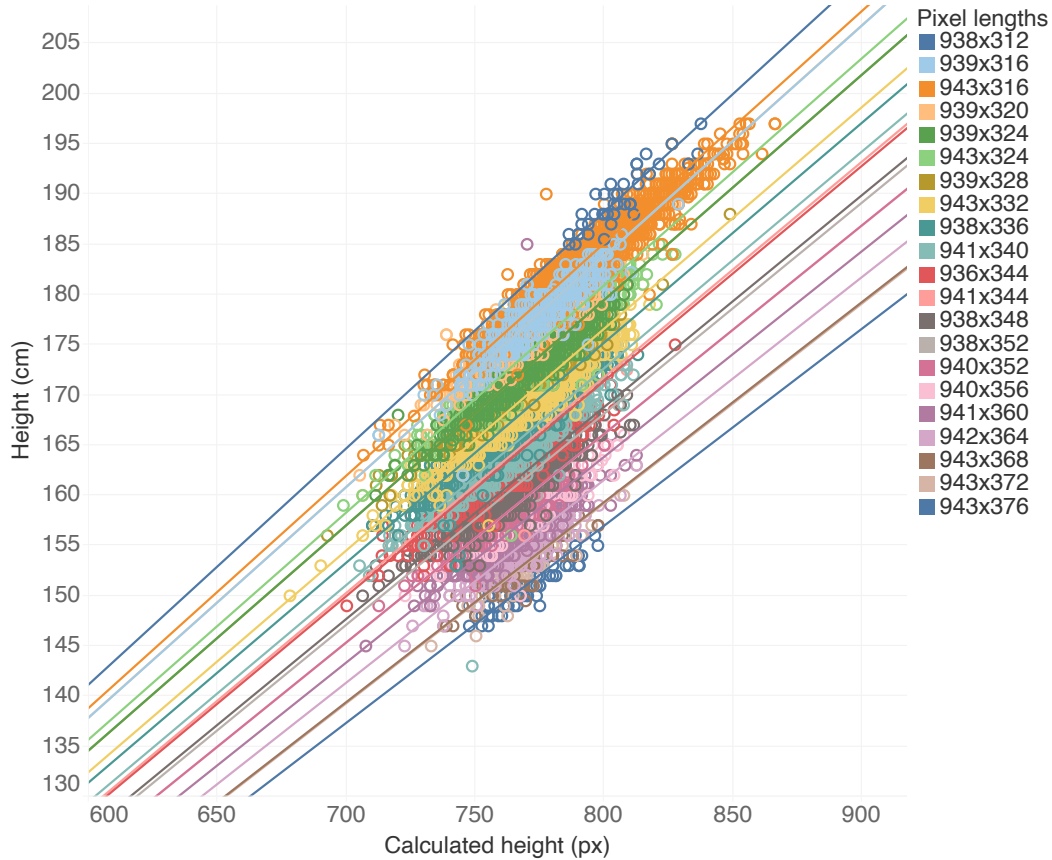

777  
778 **Fig. S4. A linear regression of image-measured height against UKB-measured height.** For  
779 each image pixel-ratio, we regressed height measured in the UKB with height we calculated in  
780 pixels from the DXA scan. This provided a conversion from pixels to cm that we used as a  
781 normalization factor to correct for differences in resolution.

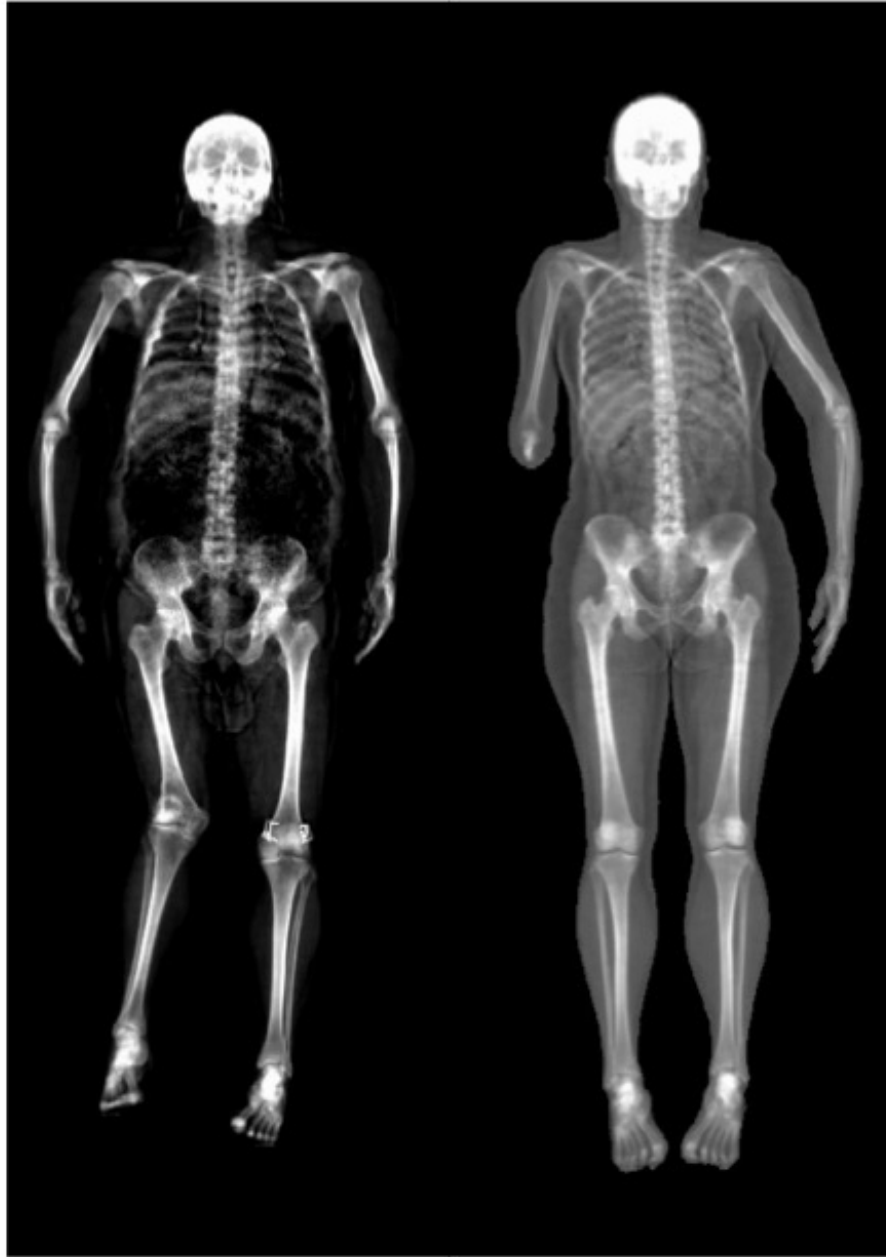

804  
805 **Fig. S5. Examples of individuals who were outliers on our measurement and were removed**  
806 **from analysis.** (Left) Individual with femur deformity and metal implants. (Right) Individual  
807 with missing forearm.

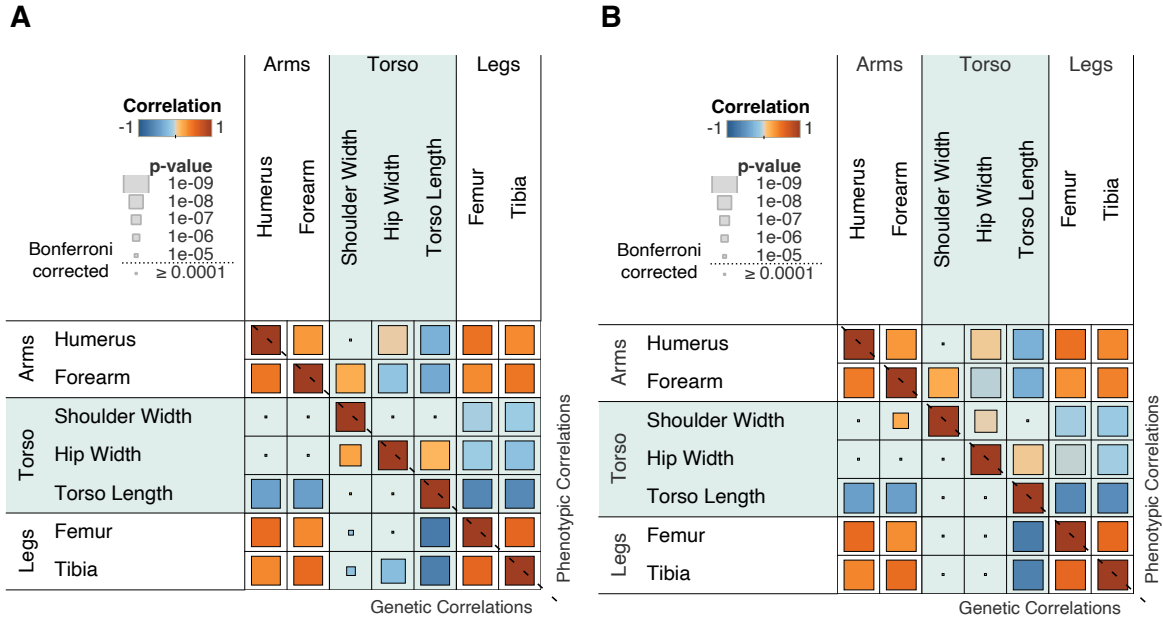

926  
927  
928  
929  
930  
931

**Fig. S6. A heatmap comparison of genotype and phenotype correlations between ratios and residuals. (A)** Matrix of genotype and phenotype correlation with each phenotype computed as a ratio of height. **(B)** Matrix of genotype and phenotype correlation with each phenotype computed by regressing the phenotype with height and then obtaining residuals.

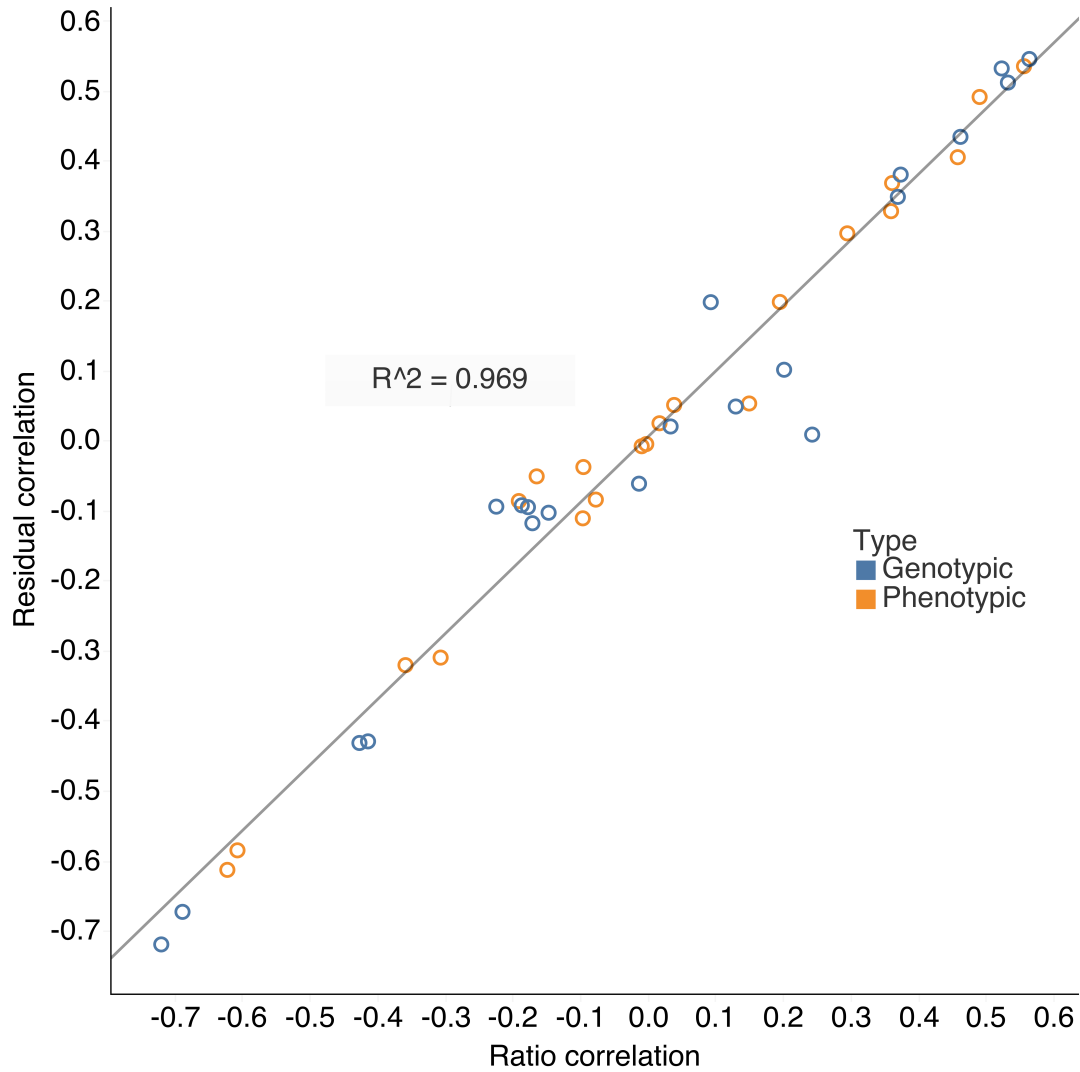

932

933 **Fig. S7.** Correlation of genotype and phenotype correlations across skeletal traits, computed

934 using ratios with height and second residualizing for height

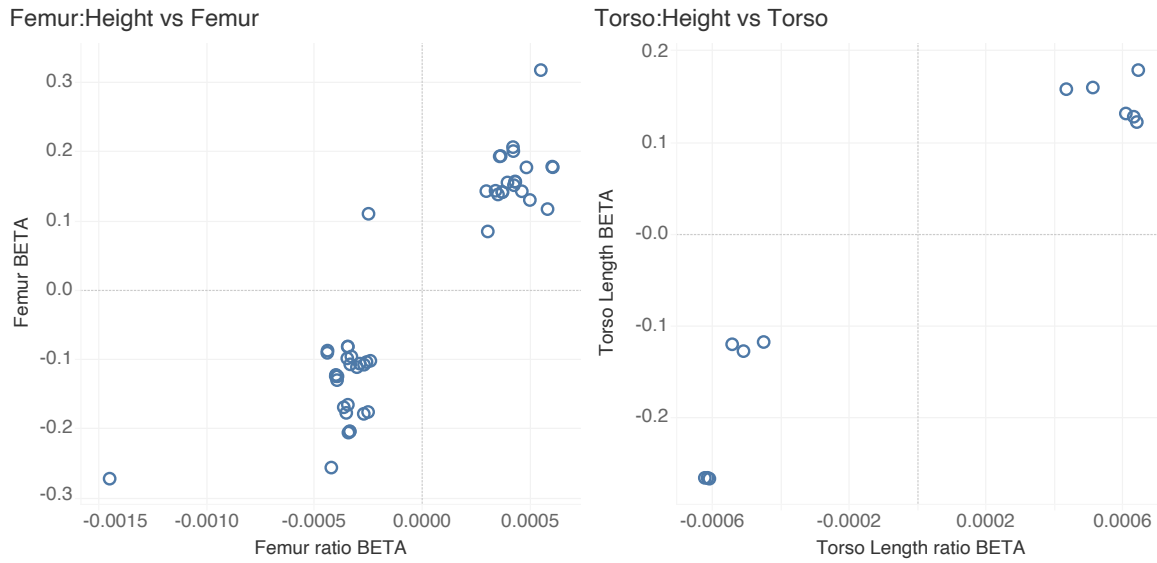

945

946 **Fig. S8. Comparison of effect estimates of independent genome-wide significant SNPs**  
947 **across different phenotypes.** Effect estimates of genome-wide significant SNPs for each  
948 phenotype ( $p < 5e-08$ ) showing same effect directionality for skeletal proportions and raw  
949 measurements.



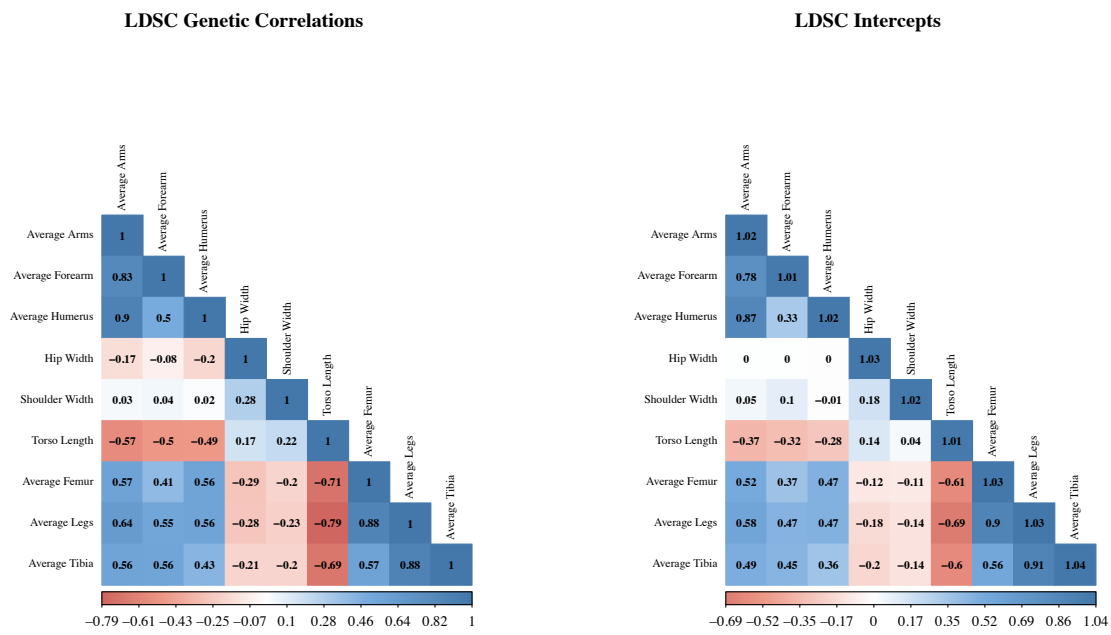

1126  
1127  
1128  
1129

**Fig. S9.** Heatmap of genetic correlations and LDSC cross-trait intercepts across skeletal proportion phenotypes within odd-numbered chromosomes

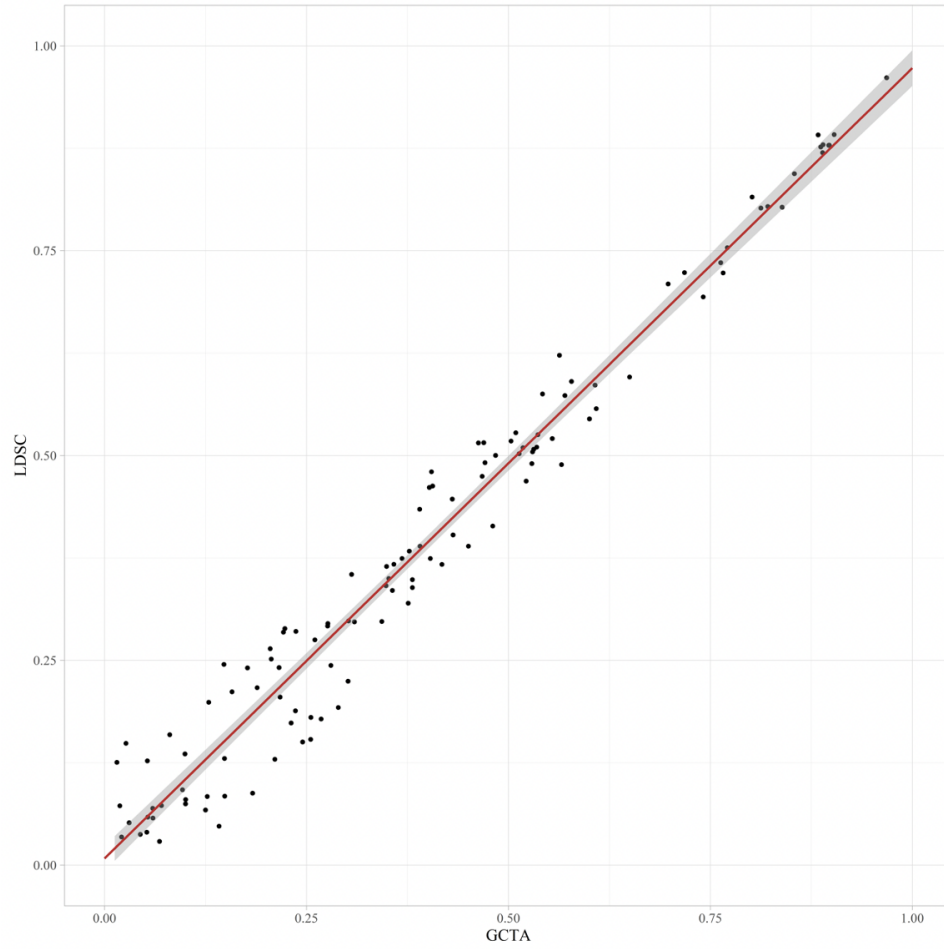

1130

1131 **Fig. S10.** Scatterplot of GCTA and LDSC genetic correlation estimates across skeletal ratios.

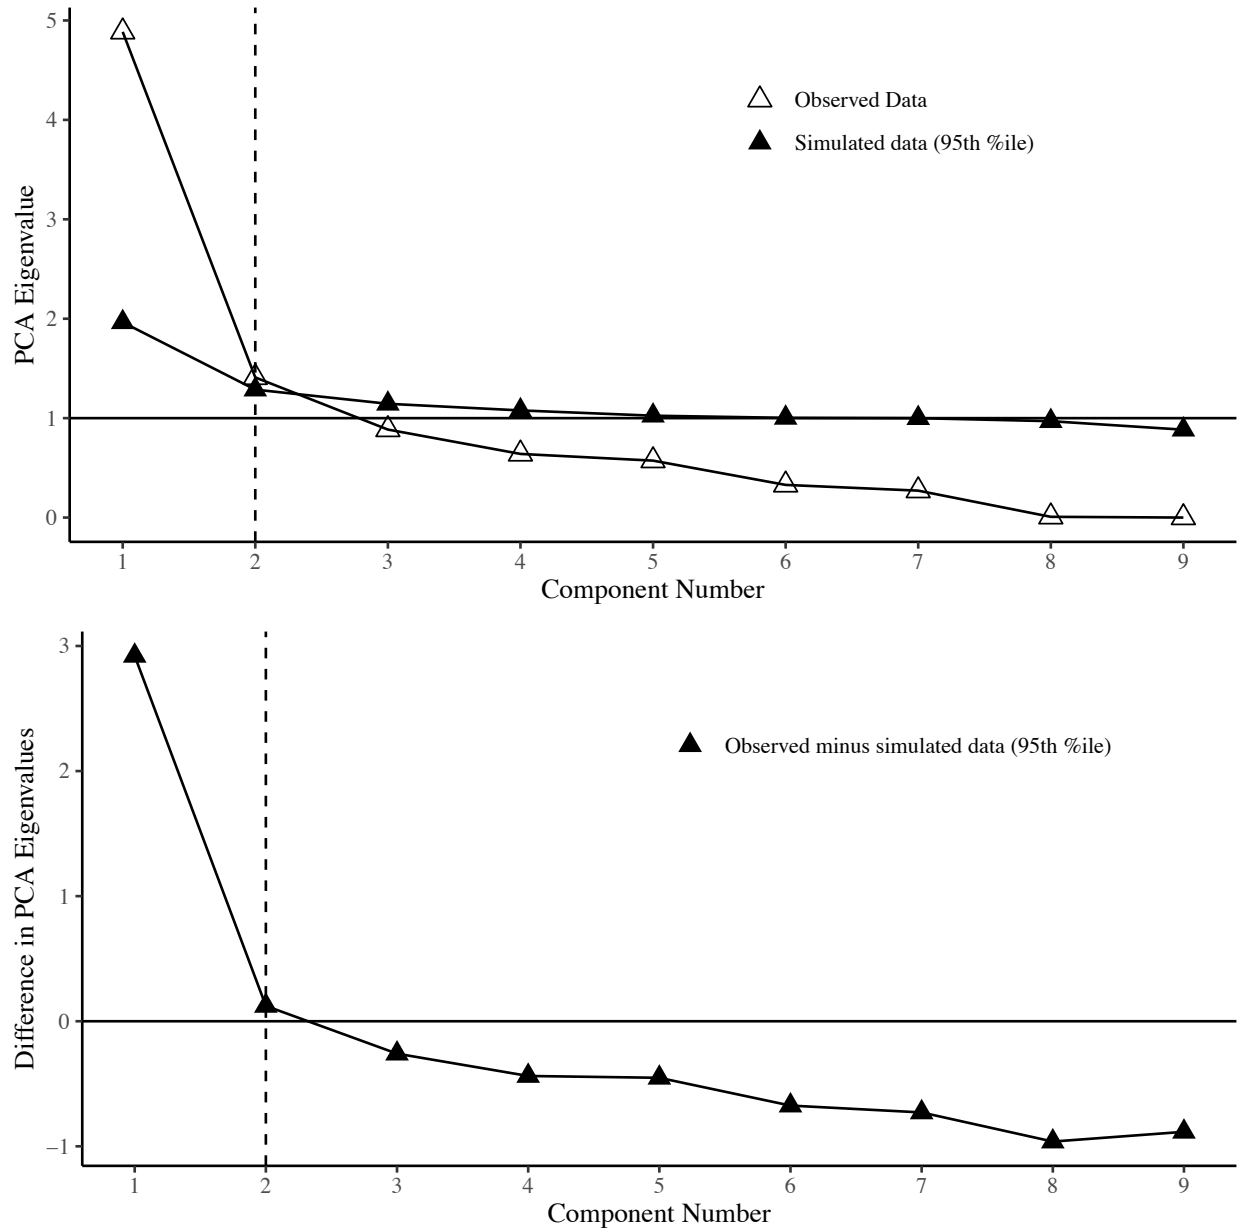

1132

1133 **Fig. S11.** Screeplots of PCA and difference in PCA from LDSC Parallel Analysis

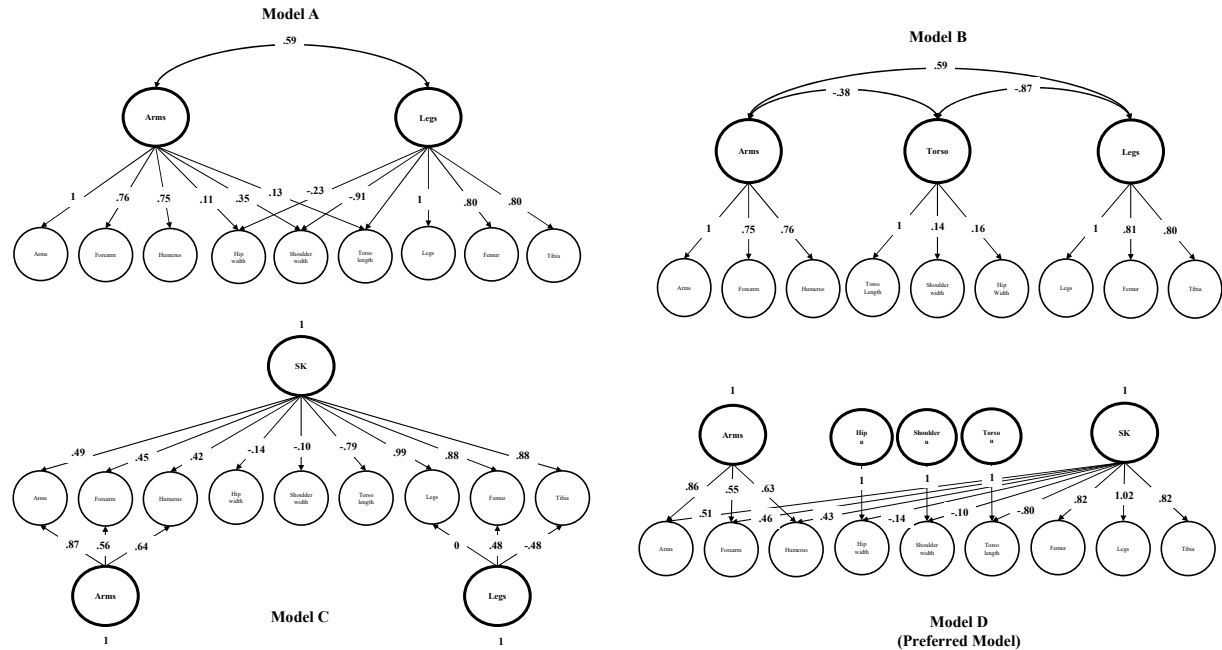

1134  
1135 **Fig. S12. Confirmatory factor models of skeletal traits (even autosomes)**  
1136

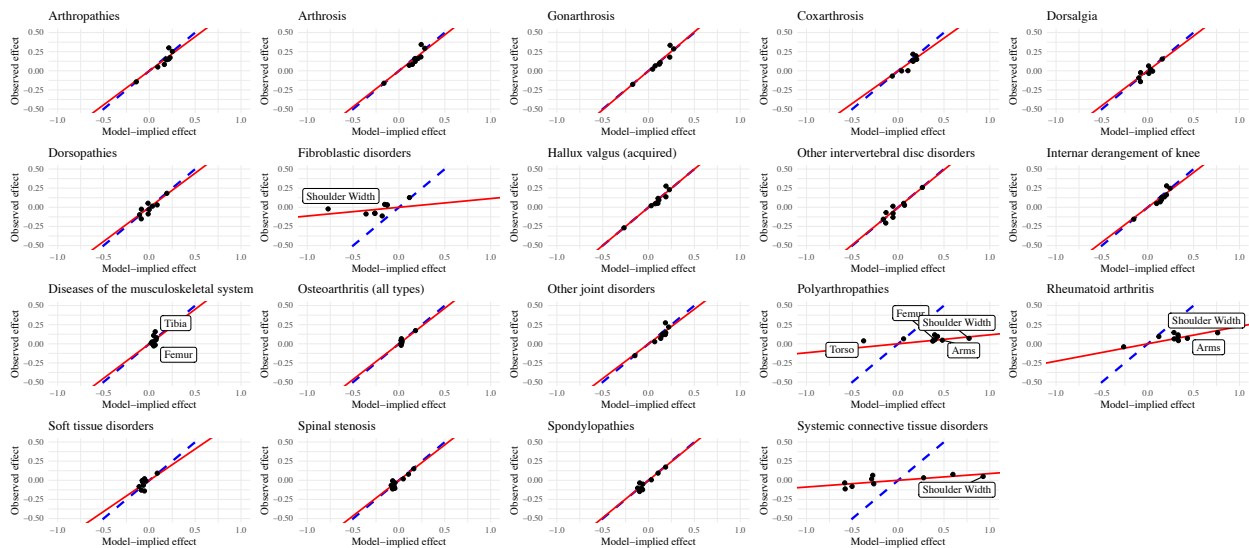

1137  
1138 **Fig. S13. Scatterplots of observed and model-implied effects between musculoskeletal**  
1139 **diseases and skeletal endophenotypes.** Red lines represent best fitting regression lines. Blue  
1140 dashed lines represent perfect fit (Observed effects = Model-implied effects). Labeled traits are  
1141 outliers detected based on standardized differences between the observed and the common factor  
1142 model-implied effects for the skeletal traits > 2.  
1143

1144

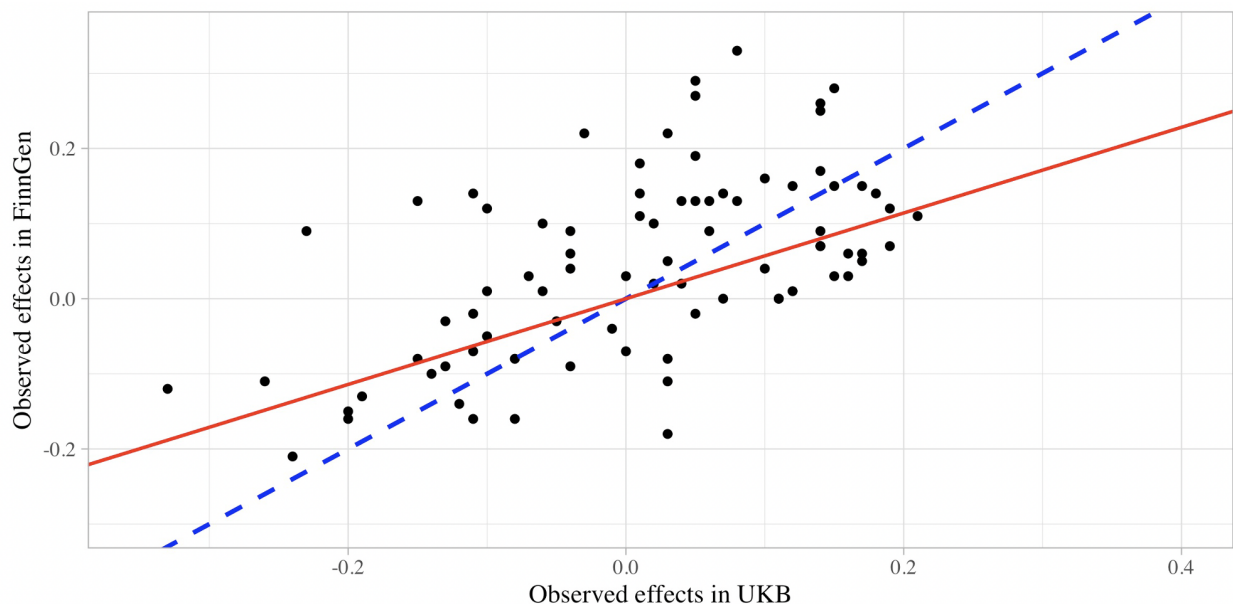

1145  
1146  
1147  
1148  
1149

**Fig. S14. Observed effects of skeletal traits on musculoskeletal diseases common in UKB and FinnGen.** Red lines represent best fitting regression lines. Blue dashed lines represent perfect correspondence (intercept = 0, slope = 1).

**Model D (traits residualized by height)**

$\chi^2(13) = 197.76, p < 0.001$   
AIC = 227.762  
CFI = 0.93  
SRMR = 0.06

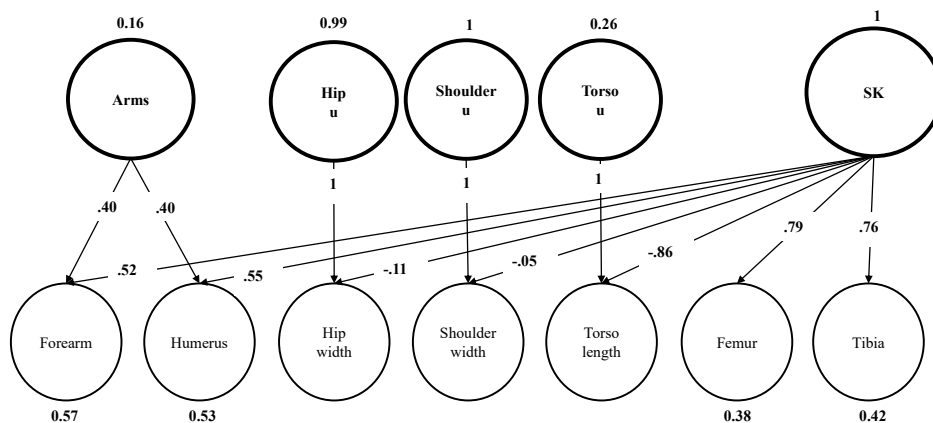

1150  
1151  
1152  
1153  
1154

**Fig. S15. Confirmatory Factor Model D applied to residuals.** Preferred model D fully standardized parameter estimates fitted on height-residualized skeletal traits as well as excluding overall arms and leg length

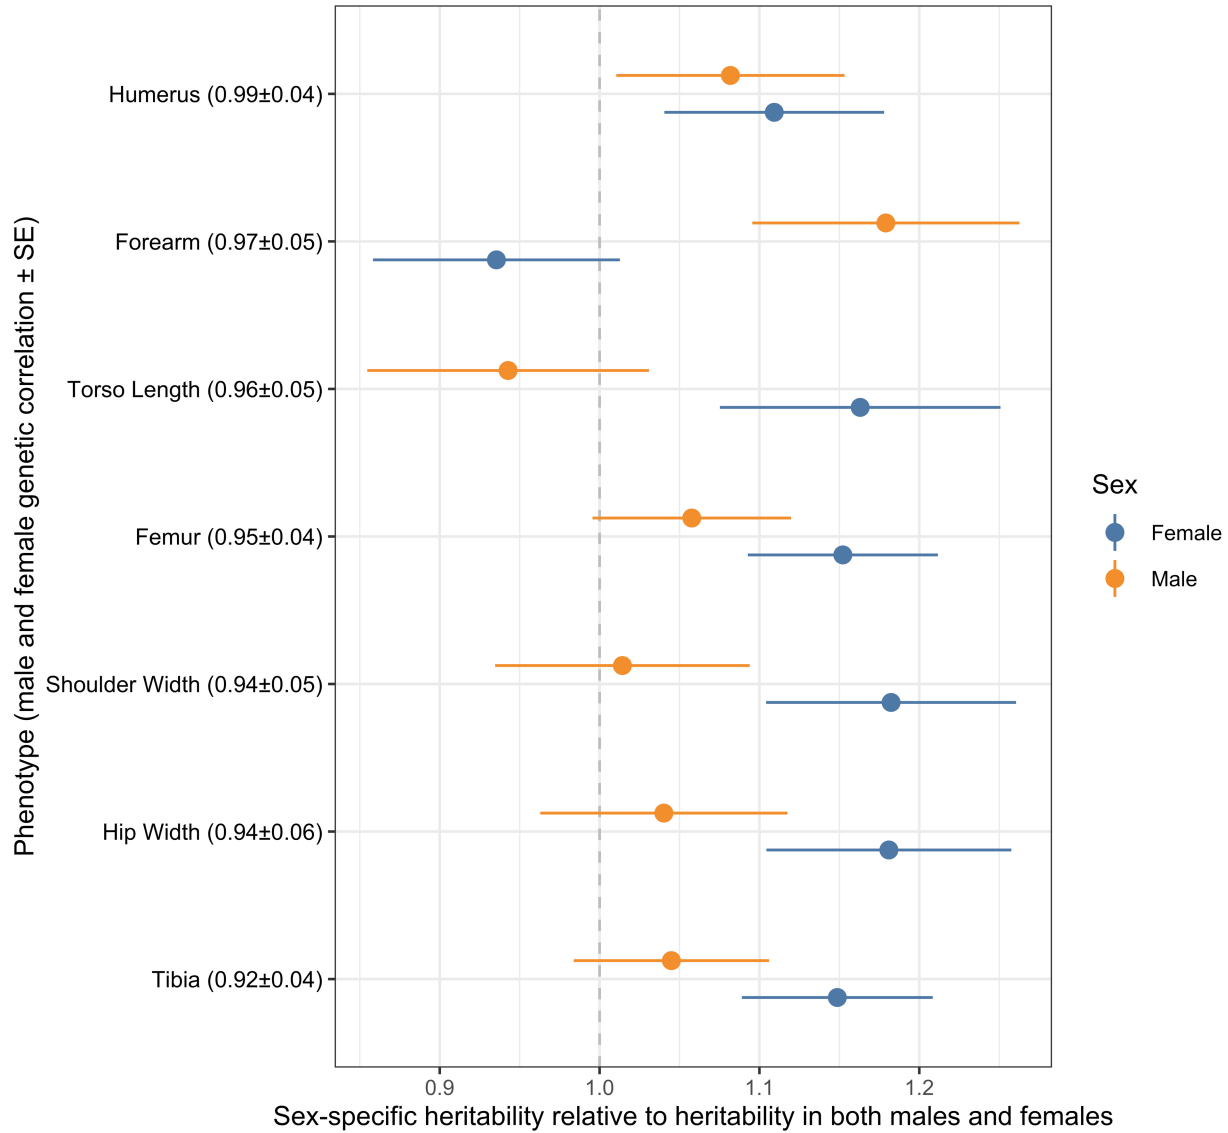

1182

1183 **Fig. S16.** Genetic correlations between males and females, estimated using bi-variate LD Score

1184 Regression shown for each trait (y-axis). SNP heritability divided by the SNP heritability

1185 estimated in the sample with both sexes combined (x-axis) for all traits

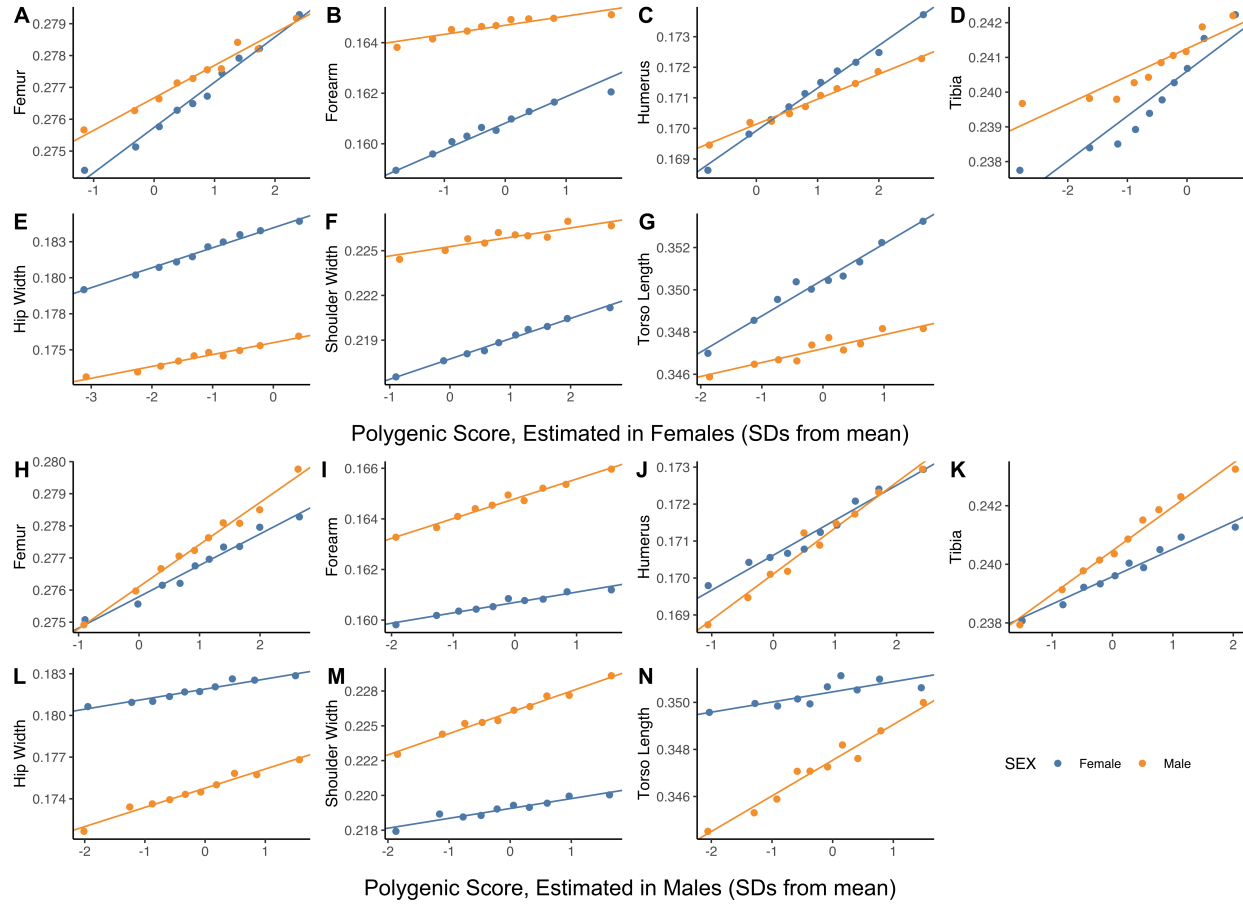

1186

1187

1188

1189

1190

**Fig. S17.** Regression of trait values in males (orange) and separately in females (blue) to a polygenic score estimated in an independent sample of females. Points show mean values in one decile of the polygenic score; the fitted line and associated effect estimate and  $R^2$  correspond to regressions on the raw, non-binned data.

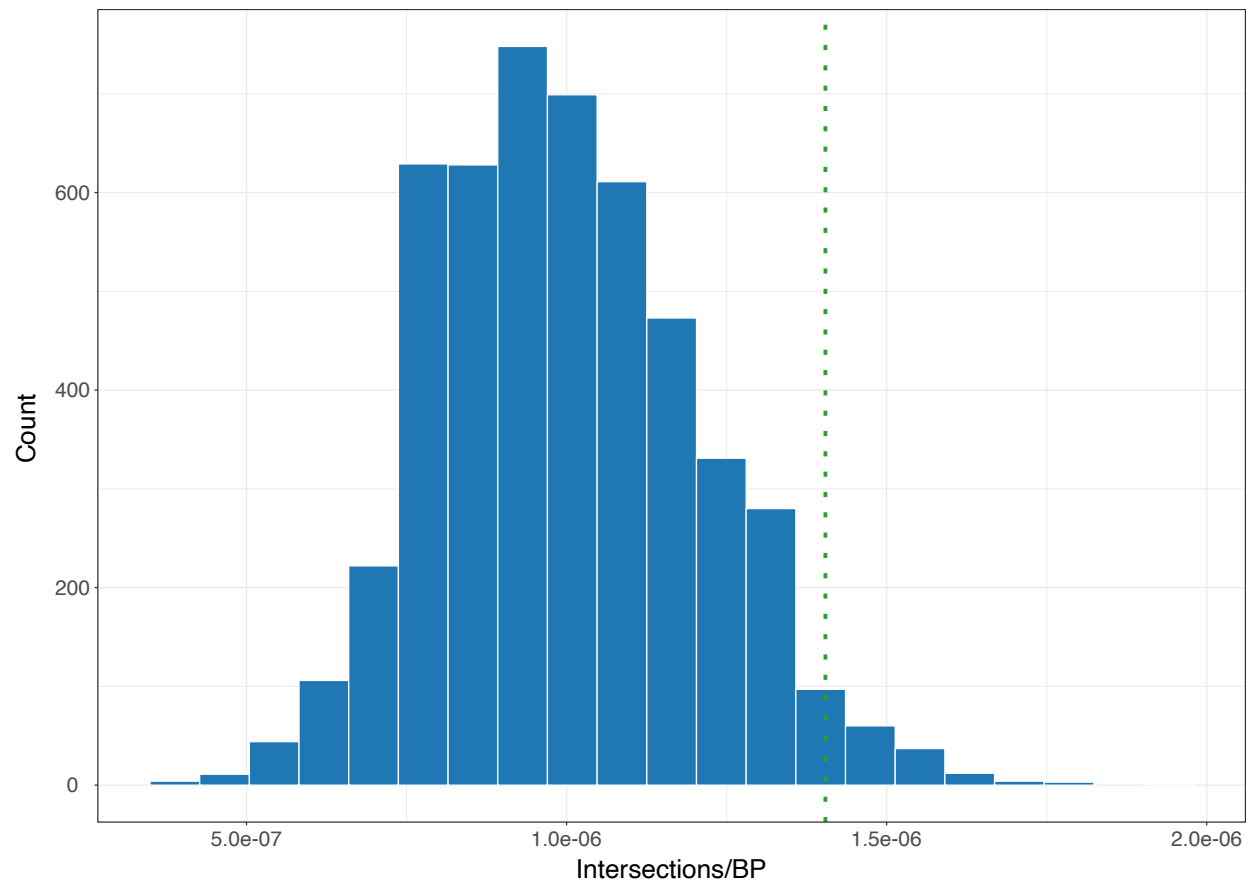

1359  
1360 **Fig. S18. HAR background distributions.** Intersections per base pair occurring between human  
1361 accelerated regions (HARs) and phenotype-associated genes. Blue bars are background  
1362 distributions generated from 5,000 simulations of matched element sets. An example is shown  
1363 here for skin pigmentation.
